# Supplementary material for: International teacher survey on green and sustainable chemistry (GSC) practical activities: design and implementation
Source: publisher site journal article supplement (doi:10.1515/cti-2024-0050), 2024-08-03
Supplement: Supplementary file 1 [file j_cti-2024-0050_suppl_001.docx]

Supplementary Information for **International Teacher Survey on Green and Sustainable Chemistry (GSC) Practical Activities: Design and Implementation**

1. Complete list of survey questions (in English)
2. Complete list of additional country-specific survey questions used (in English and local language)

**Complete list of survey questions (in English)**

***Introduction page – Project information and consent***

*(Project information text provided varies from country to country, depending on level of human ethics informed consent required)*

This survey is designed to gather information from high school teachers about chemistry practical activities that they use in lower secondary and upper secondary classes. We are interested in what types of activities that teachers use, why they chose them, and in particular whether activities relating to green chemistry and sustainability are being used.

Responses from different countries will be compared as part of this research project.

This project has received funds from the IUPAC Committee on Chemistry Education ([https://iupac.org/project/2023-002-2-050/)](https://iupac.org/project/2023-002-2-050/).

**Q1**. Do you consent to participate in this survey?

- Yes (proceed to survey)
- No (skip to end of survey)

***Page 1 – Demographic data***

*(Q2 and Q6a were different for each country, and these questions were written in consultation with each individual country coordinator)*

**Q2.** What university or college degrees have you completed?

- Bachelor of Education
- Bachelor of Science
- Bachelor of Arts
- Graduate Diploma Education / Secondary Teaching
- Masters of Teaching
- Masters of Education
- Masters of Arts
- Doctorate of Philosophy/PhD
- Other _________________

**Q3.** Were you trained as a chemistry teacher? Do you have a chemistry teaching specialization?

- Yes
- No

**Q4.** How many years of experience do you have as a teacher in a school?

- - First year of teaching
  - 2nd-5 years
  - 6-10 years
  - 10-15 years
  - More than 15 years

**Q5.** How many years of experience do you have teaching a chemistry-focused subject in a school?

- First year of teaching
- 2nd-5 years
- 6-10 years
- 10-15 years
- More than 15 years

**Q6a.** Which of the following subjects are you currently teaching? (choose one or more)?

- Years 7-8 Chemistry (within a science subject)
- Years 9-10 Chemistry (within a science subject)
- Year 11 Chemistry
- Year 12 Chemistry
- Other ____________

**Q6b.** What other subjects do you currently teach? [open-text response]

***Page 2 - Chemistry practical activities***

(*Survey page starts with explanatory text)*

When answering the following questions, please provide responses that apply to your typical teaching, not special circumstances (e.g. COVID-19 remote teaching).

Note that the questions refer to practical sessions conducted at school. Please do not respond about activities that your students may take part in outside of school (e.g. excursions to universities or science centres).

**Q7a.** If you teach chemistry at multiple levels, please choose a specific class for this page of questions. Please indicate which class that is in this box [open-text response or subject list similar to Q6a]

**Q7b.** How often do you typically do each of the following in your chemistry teaching? :

|  | Never | A few times per year | Around once per month | Around once per week | More than once per week |
| --- | --- | --- | --- | --- | --- |
| Have the students perform a chemistry experiment as a practical activity |  |  |  |  |  |
| Demonstrate a chemical experiment in front of the class |  |  |  |  |  |
| Have the students interact with a computer simulation of a chemical process (e.g. PhET simulations) |  |  |  |  |  |
| Show a video of a chemical reaction or experiment *being conducted by someone else* |  |  |  |  |  |
| Show an animation of a chemical process at the particle / sub-microscopic level |  |  |  |  |  |
| Provide students with experimental / secondary data to analyse or perform calculations |  |  |  |  |  |

**Q8.** Please indicate the importance of each of the following factors when choosing chemistry practical activities to do with your class (either demonstration or student-performed).

|  | Not at all important | Slightly important | Moderately important | Very important | Extremely important |
| --- | --- | --- | --- | --- | --- |
| The practical activity helps students develop conceptual understanding / Students can readily link their observations to current curriculum topic |  |  |  |  |  |
| Easy to set up / Have all the required equipment and chemicals |  |  |  |  |  |
| Students like doing practical activities |  |  |  |  |  |
| Students behave better during practical sessions than if they are just listening and writing |  |  |  |  |  |
| Students have opportunities to write a lab report |  |  |  |  |  |
| Students have opportunities to develop critical thinking and problem-solving skills |  |  |  |  |  |
| Students get the correct result/ experiment always works |  |  |  |  |  |
| Students learn chemistry techniques (such as weighing, titration, observing...) |  |  |  |  |  |
| Students work together and learn teamwork skills |  |  |  |  |  |
| Practical activity is safe |  |  |  |  |  |

**Q9.** What other factors are important to your choice of practical activities? [open-text response]

**Q10.** What factors prevent you from using chemistry practical activities more often in your class? Select all that apply. If you think your students do enough practical activities, please leave blank.

- - Not enough time in class
  - Not enough time outside of class to prepare
  - Lack of class time in a school laboratory
  - Lack of resources (chemicals, equipment, disposal)
  - Lack of knowledge of suitable experiments to do
  - I am not confident handling chemicals
  - Curriculum constraints - practical activity does not fit with curriculum topics
  - Other (please specify in box provided)

***Page 3 – Green and sustainable chemistry practical activities***

(*Survey page starts with explanatory text)*

For the remainder of the survey, a practical activity is a chemical reaction, experiment or demonstration performed in the classroom or laboratory by students or a teacher. Videos, simulations and animations are not practical activities.

In this IUPAC project, we are particularly interested in any practical activities that you use that relate green chemistry and / or sustainable chemistry in any class. For the purposes of this survey, we provide here a definition of both.

**Green chemistry** is the design of chemical products and processes that reduce or eliminate the use and generation of hazardous substances (https://www.acs.org/greenchemistry/principles/12-principles-of-green-chemistry.html)

**Sustainable chemistry** is the development and application of chemicals, chemical processes, and products that improve the manner in which natural resources are used to meet the needs of current and future generations, without harmful impacts to humans and ecosystems (https://www.sustainablechemistrycatalyst.org/s/Defining-Sustainable-Chemistry-Report-Feb-2023.pdf).

There are many chemistry topics related to these, for example, issues in agriculture, plastics, pollution and renewable energy. Examples of practical activities include making a bioplastic or biofuel from food stuffs.

**Q11.** What proportion of the practical activities either conducted by your students or that you perform in front of the class relate chemistry to sustainability? [Slide bar – 0 to 100%]

**Q12.** Please indicate the importance of each of the following factors when choosing chemistry practical activities to do with your class (either demonstration or student-performed).

|  | Not at all important | Slightly important | Moderately important | Very important | Extremely important |
| --- | --- | --- | --- | --- | --- |
| The practical activity is clearly linked to local environmental issues |  |  |  |  |  |
| Students find green chemistry and sustainability issues and topics engaging |  |  |  |  |  |
| Practicals are a way to introduce green chemistry and sustainability through a hands-on activity |  |  |  |  |  |
| Students have opportunities to develop critical thinking and problem-solving skills related to green and sustainable chemistry |  |  |  |  |  |

**Q13**. Where do you normally obtain your chemistry practical activities related to **green chemistry and/or sustainable chemistry**?? Select all that apply.

- - Learned from other teachers
  - Learned during university studies / teacher training (pre-service)
  - Learned during professional development after starting teaching career
  - Read about in a magazine or online (if so, please list sources in box)
  - Heard about at a conference
  - Designed myself
  - Other (please specify in box)
  - I do not consider green and sustainable chemistry activities in my teaching

***Page 4- Open-text responses***

**Q14.** Please name up to three chemistry practical activities that you typically use in your class, and identify if any of these are about green chemistry and/or sustainability [short answer open-text response].

**Q15.** If applicable, please describe a specific example of a **practical activity** that you have adapted by incorporating principles of green chemistry or sustainability [short answer open-text response]

**Q16.** If you would like to use more practical activities related to sustainability, what additional resources would you require? What challenges do you face? [short answer open-text response]

**Q17.** Please provide any other comments that you wish to make about chemistry practical activities or sustainability in your teaching.

*(Moving to next page concludes the survey and their completed response is tabled in Qualtrics)*

***End of survey message***

**Thank you for your participation in this survey.**If you wish to receive a certificate of participation in the survey, click here.

We are keen to collect examples of practical activities, related to green chemistry / sustainability / circular economy, that can be shared with the larger worldwide chemistry teacher community. These will be shared on a new IUPAC project website, in both your language and in English.

Collecting these will involve a brief discussion with a university person in your country.

If you are interested, please click the link here to send an email to the IUPAC project team, who will forward this to your national representative.  

**Complete list of additional country-specific survey questions used (in English)**

| ***Argentina***  Spanish | Q1 (from Spain)  In your opinion, does the Masters Degree in Secondary Education Teacher Training prepares you for designing and using practical activities in chemistry teaching?   - Yes - No - I did not complete this Masters Degree | Q1  ¿Considera que ha recibido formación suficiente, durante la carrera que lo habilita para ejercer la docencia, para diseñar y realizar con su alumnado actividades prácticas para la enseñanza de la química?   - Sí - No - No, aún soy un docente en formación pero ejerzo la docencia. |
| --- | --- | --- |
| Q2 (from Spain, modified)  (Answer only if your students DO NOT belong to Secondary Education oriented to Natural, Chemical or Technical Sciences)  How often your Secondary Education students work in the school laboratory every session?   - Every class - Once a week (if you have classes more than once a week) - Every 15 days - Once a month - A few times a year - Once a year - Never - The number of times varies depending on the group of students - Currently I do not teach Secondary Education courses - Other answer: | Q2  (Responda sólo si su alumnado NO pertenece a Educación Secundaria orientada a Cs. Naturales, Química o Técnica)  ¿Con qué frecuencia su alumnado de Escuela Secundaria trabaja en el laboratorio?   - Todas las clases - Una vez por semana (si tiene clases más de una vez por semana) - Cada 15 días. - Una vez al mes. - Algunas veces al año. - Una vez por año. - Nunca. - La cantidad de veces varía según el grupo de alumnos. - Actualmente no soy docente de Escuela Secundaria - Otra respuesta: |
| Q3 (from Spain, modified)  (Answer only if your students DO belong to Secondary Education oriented to Natural, Chemical or Technical Sciences)  How often your Higher Secondary Education students work in the school laboratory every session?   - Every class - Once a week (if you have classes more than once a week) - Every 15 days - Once a month - A few times a year - Once a year - Never - The number of times varies depending on the group of students - Currently I do not teach Secondary Education courses - Other answer: | Q3  (Responda sólo si su alumnado pertenece a Educación Secundaria orientada a Cs. Naturales, Química o Técnica) ¿Con qué frecuencia su alumnado de Escuela Secundaria trabaja en el laboratorio?   - Todas las clases - Una vez por semana (si tiene clases más de una vez por semana) - Cada 15 días. - Una vez al mes. - Algunas veces al año. - Una vez por año. - Nunca. - La cantidad de veces varía según el grupo de alumnos. - Actualmente no soy docente de Escuela Secundaria - Otra respuesta: |
| ***Australia***  English | Q1  Have you studied or been exposed to the field of sustainability chemistry and green chemistry? If so, where were you exposed? |  |
| Q2 (from Slovakia, modified)  Did your pre-service/initial teacher education include any instruction on teaching green chemistry or sustainability topics? If yes, please provide examples. If you don't remember, leave this response blank. |  |
| Q3 (from USA)  When your students are engaged in green chemistry or sustainable chemistry-related practical activities in your classes, what are the most common 3 or 4 learning objectives that you look for your students to learn? |  |
| Q4 (from Indonesia, modified)  Consider the most recent implementation of a new chemistry curriculum in your state. Did it encourage you to incorporate new practical activities that apply the green chemistry and sustainability principles? If yes, please explain why. If not, please explain why it didn't. |  |
| ***Austria***  German | Q1  In which areas have you already come into contact with topics of green and sustainable chemistry?   - Studying (please give an example) - In the case of further training (if so, which ones?) - At scientific conferences (if so, which ones?) - In professional journals (if so, which ones?) - In conversation with colleagues - On the Internet | Q1  In welchen Bereichen sind Sie mit Themen der Grünen und Nachhaltigen Chemie bereits in Berührung gekommen?   - Im Studium (bitte geben Sie ein Beispiel an) - Bei Fortbildungen (wenn ja, welche?) - Bei wissenschaftlichen Tagungen (wenn ja, welche?) - In Fachzeitschriften (wenn ja, welche?) - Im Gespräch mit Kolleg:innen - Im Internet |
| Q2  Please indicate whether you are aware of the Green and Sustainable Chemistry activities of the following institutions:  Platform for Green Chemistry in Austria" (https://www.gruenechemieoesterreich.at/)?   - Yes - No   Austrian Educational Competence Centre Chemistry (AECC) (https://aeccc.univie.ac.at/forschung/laufende-projekte/gruene-und-nachhaltige-chemie)   - Yes - No | Q2  Bitte geben Sie an, ob Sie die Aktivitäten zur Grünen und Nachhaltigen Chemie der folgenden Institutionen kennen:  Plattform Grüne Chemie in Österreich“ (<https://www.gruenechemieoesterreich.at/>)?   - Ja - Nein   Österreichisches Kompetenzzentrum für Didaktik der Chemie (https://aeccc.univie.ac.at/forschung/laufende-projekte/gruene-und-nachhaltige-chemie)   - Ja - Nein |
| Q3  What offers would you use for the planning and implementation of your lessons on Green and Sustainable Chemistry?   - Collection of Experimental Instructions for Green and Sustainable Chemistry - Teaching concepts for green and sustainable chemistry - Test Kits with Chemicals and Equipment for Green and Sustainable Chemistry Experiments - Digitally available materials (e.g. SpottingScience) - Advanced training on green and sustainable chemistry - Presentations by experts in your classroom - (interdisciplinary) Project days at your school with experts - Materials for the design of an (interdisciplinary) project day - Other (please specify) | Q3  Welche Angebote würden Sie für die Planung und Durchführung Ihres Unterrichts zur Grünen und Nachhaltigen Chemie nutzen?   - Sammlung von Versuchsanleitungen zur Grünen und Nachhaltigen Chemie - Unterrichtskonzeptionen zur Grünen und Nachhaltigen Chemie - Versuchs-Sets mit Chemikalien und Geräten für Versuche zur Grünen und Nachhaltigen Chemie - Digital verfügbare Materialien (z.B. SpottingScience) - Fortbildungen zur Grünen und Nachhaltigen Chemie - Vorträge von Expert:innen in Ihrem Unterricht - (fachübergreifende) Projekttage an ihrer Schule mit Expert:innen - Materialien für die Gestaltung eines (fachübergreifenden) Projekttags - Sonstiges (bitte angeben) |
| ***Bosnia and Herzegovina***  Bosnian, Croatian, Serbian | Q1 (from Serbia)  Within which subject do you perform chemistry practical activities related to green chemistry and/or sustainability?   - Chemistry as a general subject - Vocational subjects from chemistry branches - Elective subjects that include chemistry contents - Other (please specify) | Q1  U okviru kog predmeta izvodite praktične aktivnosti koje se odnose na zelenu hemiju i/ili održivi razvoj?   - Hemija kao opšteobrazovni predmet - Stručni predmet iz oblasti hemije - Izborni predmet koji obuhvata hemijske sadržaje - Drugo (navedite tačno). |
| Q2 (from Serbia)  In which type of classes do you or/and your students perform chemistry practical activities related to green chemistry and/or sustainability?   - Regular classes - Additional classes - After school activities - School chemistry club - Out of school activities - Other (please specify) | Q2  U okviru kakve nastave vi ili vaši učenici izvodite hemijske praktične aktivnosti vezane za zelenu hemiji i/ili održivi razvoj?   - Regularna nastava - Dodatna nastava - Vannastavne aktivnosti - Školski hemijski klub - Izvanškolske aktivnosti - Drugo (navedite tačno). |
| ***Portugal***  Portuguese | Q1  Indicate the importance of each of the following actions.  (Nothing important; Slightly important; Moderately important; Very important; Extremely important)   - Conduct training on Sustainability. - Conduct training on Sustainable Chemistry and Green Chemistry. - Introduction of the themes "Sustainable Chemistry" and "Green Chemistry" in the curricula of Physics and Chemistry teacher training - Introduction of the themes "Sustainable Chemistry" and "Green Chemistry" in the curricula of basic education. - Development of the themes "Sustainable Chemistry" and "Green Chemistry" in secondary school curricula. | Q1  Indique a importância de cada uma das seguintes ações.  (Nada importante; Ligeiramente importante; Moderadamente importante; Muito importante; Extremamente importante)   - Realizar formação sobre Sustentabilidade. - Realizar formação sobre Química Sustentável e Química verde. - Introdução dos temas “Química Sustentável” e “Química Verde” nos currículos de formação de professores de Física e Química. - Introdução dos temas “Química Sustentável” e “Química Verde” nos currículos do ensino básico. - Desenvolvimento dos temas “Química Sustentável” e “Química Verde” nos currículos do ensino secundário. |
| Q2  Do you consider relevant the implementation of tasks, for example in DAC (Domains of curricular autonomy) projects, on Sustainability, Sustainable Chemistry and Green Chemistry, to develop the scientific literacy of students? | Q2  Considera relevante a implementação de tarefas, por exemplo nos projetos das DAC (Domínios de autonomia curricular), sobre a Sustentabilidade, Química Sustentável e Química Verde, para desenvolver a literacia científica dos alunos? |
| ***Cape Verde***  Portuguese | Q1 (from Portugal)  Indicate the importance of each of the following actions.  (Nothing important; Slightly important; Moderately important; Very important; Extremely important)   - Conduct training on Sustainability. - Conduct training on Sustainable Chemistry and Green Chemistry. - Introduction of the themes "Sustainable Chemistry" and "Green Chemistry" in the curricula of Physics and Chemistry teacher training - Introduction of the themes "Sustainable Chemistry" and "Green Chemistry" in the curricula of basic education. - Development of the themes "Sustainable Chemistry" and "Green Chemistry" in secondary school curricula. | Q1  Indique a importância de cada uma das seguintes ações.  (Nada importante; Ligeiramente importante; Moderadamente importante; Muito importante; Extremamente importante)   - Realizar formação sobre Sustentabilidade. - Realizar formação sobre Química Sustentável e Química verde. - Introdução dos temas “Química Sustentável” e “Química Verde” nos currículos de formação de professores de Física e Química. - Introdução dos temas “Química Sustentável” e “Química Verde” nos currículos do ensino básico. - Desenvolvimento dos temas “Química Sustentável” e “Química Verde” nos currículos do ensino secundário. |
| Q2  Specifically in what subject topics and educational levels would you implement green chemistry and sustainability? Why? (Explain your answer) | Q2  Especialmente em que conteúdos e níveis de ensino você implementaria a química verde e a sustentabilidade? Porquê? (Explique sua resposta) |
| ***Croatia***  Croatian | Q1 (from Kosovo, modified)  Which secondary school profile do you work in?   - Gymnasium, general - Gymnasium, linguistic - Gymnasium, scientific and mathematical - Gymnasium, technical - Gymnasium, scientific - Vocational school, 4 years long - Vocational school, 3 years long - Art school | Q1  U kojoj vrsti srednje škole radite?   - Gimnazija, opća - Gimnazija, jezična - Gimnazija, prirodoslovno-matematička - Gimnazija, klasična - Gimnazija, prirodoslovna - Strukovna škola, četverogodišnja - Strukovna škola, trogodišnja - Umjetnička škola |
| Q2 (from Poland, modified)  Please indicate to what extent you agree with the following statements:  (I strongly agree; I agree; I neither agree nor disagree; I disagree; I strongly disagree)   - I am trained to discuss topics related to green chemistry and/or sustainability in my chemistry classes - I am trained to discuss topics related to sustainability in my chemistry classes - More space should be allocated in the chemistry curriculums for topics related to green chemistry and sustainable development - Knowledge of green chemistry and sustainable development issues is an important outcome of children and youth education in the 21st century - I would like to participate in a professional development course on teaching green chemistry and sustainable development issues in chemistry classes - Together with my students, I would like to participate in the activities of a chemistry-based sustainable development project | Q2  Izrazite mjeru slaganja sa sljedećim tvrdnjama:  (U potpunosti se slažem; Slažem se; Niti se slažem, Niti se ne slažem; Ne slažem se; U potpunosti se ne slažem)   - Obrazovana/obrazovan sam za kvalitetnu raspravu o temama zelene kemije u nastavi Kemije - Obrazovana/obrazovan sam za kvalitetnu raspravu o temama održivog razvoja u nastavi Kemije - Treba ostaviti više prostora u kurikulima kemije za teme koje se odnose na zelenu kemiju i održivi razvoj - Znanja o zelenoj kemiji i održivom razvoju važan su rezultat obrazovanja djece i mladih u 21. stoljeću - Voljela/volio bih sudjelovati u programima profesionalnog usavršavanja o poučavanju problema zelene kemije i održivog razvoja - Zajedno sa svojim učenicima, voljela/volio bih sudjelovati u aktivnostima kemijski usmjerenih projekata o održivom razvoju |
| ***Czechia***  Czech | Q1  Please list the individual objectives that experimental activities integrated into chemistry education fulfills, in order of their significance. | Q1  Prosím, uveďte jednotlivé cíle, které prostřednictvím experimentální činnosti ve výuce plníte, v pořadí dle jejich významu |
| Q2  Do you think you would use the following instead of a chemistry practical?  (Why yes/Why not? Please explain your answer)   1. video recordings 2. virtual laboratories 3. animations and simulations | Q2  Myslíte si, že byste mohli místo chemických praktických cvičení použít následující:  (Proč ano / proč ne? Prosím, pro jednotlivé položky a–c vysvětlete svou odpověď.)   1. videozáznamy pokusů 2. virtuální laboratoře 3. animace a simulace |
| Q3  Especially in which topics and to what purpose would you use virtual labs, animations, simulations?  (Why? Please explain your answer. Leave blank if you would not use them)   1. video recordings 2. virtual laboratories 3. animations and simulations | Q3  Zvláště u kterých témat a za jakým účelem byste použili následující: (Proč? Vysvětlete svou odpověď. Pokud byste je nevyužili, nechte pole prázdné.)   1. videozáznamy pokusů 2. virtuální laboratoře 3. animace a simulace |
| ***Denmark***  Danish | Q1  Are there any aspects of or themes in chemistry teaching that you lack teaching material or insipartion in? | Q1  Er der aspekter eller temaer til undervisningen i kemi du savner materiale eller inspiration til? |
| Q2  Is there any specific further education / in-service education in chemistry that you would like? | Q2  Er der bestemte typer af efteruddannelse/kurser indenfor kemi du efterspørg? |
| Q3  The different levels of chemistry have different forms of exams. We would like to hear your opinion on which forms are best suited for each level. You can choose multiple options for each level if you prefer multiple types of exams for the same level, such as the current at A-level:  (Written exam with type tasks; Written exam about project; Oral exam just with theory; Oral exam with explanation of experiment; Oral exam with conducting of experiment; Oral exam with presentation of written problem/project; No exam (teacher based grade); Don't know)   - Chemistry, preparatory upper secondary school for vocational education - Chemistry C, general upper secondary school - Chemistry B, general upper secondary school - Chemistry A, general upper secondary school - Chemistry B, technical upper secondary school - Chemistry A, technical upper secondary school | Q3  De forskellige niveauer af kemi har forskellige eksamensformer. Vi vil gerne høre din holdning om hvilke former der passer bedst til de enkelte niveauer. Du kan vælge flere til hvert niveau hvis du ønsker flere typer eksamen til samme niveau, som eksempelvis den nuværende på A-niveau:  (Skriftlig eksamen med typeopgaver; Skriftlig eksamen med projektskrivning; Mundtlig eksamen kun med teori; Mundtlig eksamen med forklaring af forsøg; Mundtlig eksamen med udførelse af forsøg; Mundtlig eksamen med præsentation af opgave/projekt; Ingen eksamen (årskarakter); Ved ikke)   - Kemi NF - Kemi C, STX - Kemi B, STX - Kemi A, STX - Kemi B, HTX - Kemi A, HTX |
| ***Germany***  German | Q1 (from Slovakia)  Did your pre-service courses include any instruction on teaching green chemistry or sustainability topics? If yes, please provide examples. | Q1  War das Unterrichten von Grüner Chemie und/oder Nachhaltiger Chemie Bestandteil Ihrer Lehramtsausbildung? Wenn ja, geben Sie bitte Beispiele an. |
| Q2 (from Norway, modified)  Do you think Germany's science and chemistry teachers have enough knowledge and skills about chemistry practical activities and sustainability? If not, what are the possible reasons for these?  What steps could be taken to improve science and chemistry teachers' knowledge and skills about sustainability and practical activities? | Q2  Sind Sie der Meinung, dass deutsche Chemielehrer:innen/Natur-und Technik Lehrpersonen über genügend Kenntnisse und Fähigkeiten in Bezug auf Grüne Chemie und/oder Nachhaltige Chemie verfügen?  Wenn nicht, was sind die möglichen Gründe dafür? Welche Maßnahmen könnten ergriffen werden, um das Wissen und die Fähigkeiten von Chemielehrer:innen/Natur- und Techniklehrerinnen in Bezug auf Grüne Chemie und/oder Nachhaltige Chemie zu verbessern? |
| Q3 (from Portugal)  Indicate the importance of each of the following actions.  (Nothing important; Slightly important; Moderately important; Very important; Extremely important)   - Conduct training on Sustainability. - Conduct training on Sustainable Chemistry and Green Chemistry. - Introduction of the themes "Sustainable Chemistry" and "Green Chemistry" in the curricula of Physics and Chemistry teacher training - Introduction of the themes "Sustainable Chemistry" and "Green Chemistry" in the curricula of basic education. - Development of the themes "Sustainable Chemistry" and "Green Chemistry" in secondary school curricula. | Q3  Bewerten Sie die Wichtigkeit der folgenden Maßnahmen für die Einbindung von Grüner Chemie und/oder Nachhaltiger Chemie in den Chemieunterricht.  (Überhaupt nicht wichtig; Geringfügig wichtig; Mäßig wichtig; Sehr wichtig; Äußerst wichtig)   - Lehrkräftefortbildung zu Nachhaltigkeit, Grüner Chemie und/oder Nachhaltiger Chemie in die Chemielehramtsausbildung. - Einbindung von Nachhaltigkeit, Grüner Chemie und/oder Nachhaltiger Chemie in die Chemielehramtsausbildung. - Einführung von Grüner Chemie und/oder Nachhaltiger Chemie in die Lehrpläne der Primarstufe. - Einführung von Grüner Chemie und/oder Nachhaltiger Chemie in die Lehrpläne der Sekundarstufen. |
| Q4 (from USA)  When your students are engaged in green chemistry or sustainable chemistry-related laboratory activities in your classes, what are the most common 3 or 4 learning objectives that you look for your students to learn? | Q4  Was sind die 3 oder 4 häufigsten Lernziele, die Sie Ihren Schülern vermitteln möchten, wenn sie sich in Ihrem Unterricht mit Grüner Chemie und/oder Nachhaltiger Chemie beschäftigen? |
| ***Ghana***  English | Q1  How would you rate your knowledge in green chemistry and sustainability principles?   - Very Low - Low - Neutral - High - Very High |  |
| Q2  How well are you resourced to integrate (embed) green chemistry and sustainability principles into your lessons?   - Not at all - Very little - Little - Well-resourced - Very well resourced |  |
| Q3  Would you like to receive Professional Development in the area of integration of green chemistry and sustainability principles in your science/chemistry lessons?   - Yes - No |  |
| ***Hungary***  Hungarian | Q1  Please complete the sentence below: Education for sustainability is like ... because ... (Indicate the concept below with the help of an analogy and justify your choice!)  The education for sustainability is like ... , …because... | Q1  Kérjük, egészítse ki az alábbi mondatot: A fenntarthatóságra nevelés olyan, mint …, mert …  (Adja meg egy hasonlat segítségével az alábbi fogalmat, és indokolja választását!)  A fenntarthatóságra nevelés olyan, mint … …mert… |
| Q2  Please name up to three practical activities that you used in collaboration with other teachers or subjects for education for sustainability. | Q2  Kérjük, soroljon fel legfeljebb három olyan gyakorlati tevékenységet, amelyet más tanárokkal vagy tantárgyakkal együttműködésben alkalmazott a fenntarthatóságra való nevelés terén! |
| Q3 Please name up to three extracurricular practical activities that you used in the field of education for sustainability. | Q3  Kérjük, soroljon fel legfeljebb három olyan gyakorlati tevékenységet, amelyet tanórán kívül alkalmazott a fentarthatóságra való nevelés terén! |
| ***India***  English | Q1  Do you think that there is a delay in inclusion of Green chemistry & sustainability concept at higher secondary level in India? |  |
| Q2  Do you think that there is a need to include sustainability from lower classes such as class 3 and class 4? |  |
| Q3  Are you aware of the events like **the EnviroQuiz** is being organized for young school students for inculcating interest and understanding of environmental and sustainability issues? |  |
| ***Indonesia***  Bahasa Indonesian | Q1  Does the implementation of the new curriculum (Merdeka curriculum) encourage you to further develop practicums that apply the green chemistry and sustainability principles?   - Strongly agree - Agree - Disagree - Strongly disagree | Q1  Apakah penerapan kurikulum baru (kurikulum Merdeka) mendorong Anda untuk lebih mengembangkan praktikum yang menerapkan kimia hijau dan berkelanjutan?   - Sangat Setuju - Setuju - Tidak Setuju - Sangat Tidak Setuju |
| Q2  Explain your response to the previous question. | Q2  Jelaskan alasan Anda. |
| ***Ireland***  English | Q1  I feel confident to engage students in experiment investigations.   - Yes (if yes, state what topic areas these relate to) - No |  |
| Q2  I feel confident to engage students in experiment investigations. .   - Yes - No (if no, explain your answer) |  |
| Q3  Please indicate your confidence regarding the following areas  (Not at all confident; Slightly confident; Moderately confident; Very confident)   - Managing health and safety in the school laboratory - Risk assessing experiments (including investigations) I use in my teaching. - Correct response should there be an accident in my laboratory. - Appropriate waste disposal requirements of the chemicals I use in my teaching - Knowledge of legal requirements regarding health and safety in the school laboratory. |  |
| Q4  Please note any comments you may feel are helpful regarding your confidence managing health and safety in the school laboratory. This can relate to personal expertise as well as access to information, appropriate PPE and chemical storage facilities. |  |
| ***Italy***  Italian | Q1 (from Portugal)  Indicate the importance of each of the following actions.  (Nothing important; Slightly important; Moderately important; Very important; Extremely important)   - Conduct training on Sustainability. - Conduct training on Sustainable Chemistry and Green Chemistry. - Introduction of the themes "Sustainable Chemistry" and "Green Chemistry" in the curricula of Physics and Chemistry teacher training - Introduction of the themes "Sustainable Chemistry" and "Green Chemistry" in the curricula of basic education. - Development of the themes "Sustainable Chemistry" and "Green Chemistry" in secondary school curricula. | Q1  Indicare l’importanza delle azioni elencate di seguito utilizzando le espressioni in parentesi.  (non importante; leggermente importante; moderatamente importante; molto importante; estremamente importante)   - Condurre corsi di formazione sulla Sostenibilità. - Condurre corsi di formazione sulla Sostenibilità e sulla Chimica Verde. - Introduzione dei temi "Chimica Sostenibile" e "Chimica Verde" nei programmi di formazione dei docenti di fisica e chimica. - Introduzione dei temi "Chimica Sostenibile" e "Chimica Verde" nei curricula dell'istruzione di base. - Sviluppo delle tematiche "Chimica Sostenibile" e "Chimica Verde" nei curricula della scuola secondaria. |
| Q2 (from Serbia)  In which type of classes do you or/and your students perform chemistry practical activities related to green chemistry and/or sustainability?   - Regular classes - Additional classes - After school activities - Out of school activities - Other (please specify) | Q2  In quali classi lei e/o i suoi studenti svolgete attività pratiche di chimica legate alla chimica verde e/o alla sostenibilità?   - Corsi regolari - Corsi aggiuntivi (ad esempio: PCTO, PLS) - Attività di doposcuola - Attività fuori dalla scuola (extra curriculari) - Altro (specificare) |
| Q3 (from USA)  When your students are engaged in green chemistry or sustainable chemistry-related laboratory activities in your classes, what are the most common 3 or 4 learning objectives that you look for your students to learn? | Q3  Quando i vostri studenti sono impegnati in attività di laboratorio legate alla chimica verde o alla chimica sostenibile nelle vostre classi, quali sono i 3 o 4 obiettivi formativi (di apprendimento) più comuni che cercate di far apprendere ai vostri studenti? |
| ***Kosovo***  Albanian | Q1 (from Australia)  Have you ever heard of or been exposed to the field of green chemistry and sustainable chemistry? If so, where were you exposed? | Q1  A mendoni se mësimdhënësit e kimisë në Kosovë kanë njohuri dhe shkathtësi të mjaftueshme për aktivitetet praktike dhe zbatimin e kimisë së gjelbër dhe të qëndrueshme? Nëse jo, cilat janë arsyet e mundshme për këto? |
| Q2  Do you think that chemistry teachers in Kosovo have sufficient knowledge and skills for practical activities and the implementation of green and sustainable chemistry? If not, what are the possible reasons for this? | Q2  Hva tenker du om å skille kjemi fra naturfag i grunnskole og ungdomsskole opplæring, og å anvende kjemipraktiske aktiviteter fra tidligere trinn i et eget kjemifag? Hvordan vil en slik separasjon av kjemi fra naturfag påvirke den generelle kjemiundervisningen? |
| Q3 (from USA, modified)  What are the 3 or 4 most common learning outcomes you want your students to achieve or learn about green chemistry and sustainability? What do you think? Are practical chemistry activities related to green chemistry and sustainability sufficiently included in the new Kosovo curriculum? (Please write your answer in detail.) | Q3  Cilat janë 3 ose 4 rezultate të të nxënit më të zakonshme që synoni nxënësit tuaj ti arrijnë/mësojnë për kiminë e gjelbër dhe qëndrueshmërinë?  Çfarë mendoni, a janë të përfshira mjaftueshëm aktivitetet praktike të kimisë që lidhen me kiminë e gjelbër dhe qëndrueshmërinë në kurrikulën e re të Kosovës? (ju lutemi shkruani përgjigjen tuaj në detaje). |
| Q4  In which profile of the upper secondary school do you work?   - Gymnasium of natural sciences - High school of socio-linguistic sciences - Specialized mathematical high school - Vocational school (please specify which school and major) - Private school (please specify which school) | Q4  Ne çfarë profili të shkollës së mesme të lartë punoni?   - Gjimnazi i shkencave natyrore - Gjimnazi i shkencave shoqëror-gjuhësor - Gjimnazi i specializuar matematikor - Shkollë profesionale (ju lutemi specifikoni në cilën shkollë dhe drejtimin/et) - Shkollë private. (ju lutemi specifikoni në cilën shkollë) |
| ***Malaysia***  Malay | Q1  What financial sources are used to conduct chemistry practical activities? | Q1  Apakah sumber kewangan yang digunakan untuk menjalankan aktiviti praktikal kimia? |
| Q2  What is the impact on students after conducting a chemistry practical activity? | Q2  Bagaimanakah kesan kepada murid setelah aktiviti praktikal kimia dijalankan? |
| ***Malta***  English | Q1 (from Australia)  Have you studied and been exposed to the field of sustainability chemistry and green chemistry? If so, where were you exposed? |  |
| Q2 (from USA)  To what extent do you /or your science department in your school adhere to the following laboratory management practices?  (nearly always; most of the time; sometimes; rarely; almost never)   - minimization of waste (e.g., microscale) - use of virtual labs - use of non-toxic reagents and/or solvents - use of energy efficient processes (e.g., microwave oven for heating) - incorporation of questions in the lab writeup for students that ask about relevance of green chemistry |  |
| Q3 (from Türkiye)  In which topics and grade level would you implement the green chemistry and sustainability? Why? Please explain your answer |  |
| ***Mauritius***  English | Q1  How often do you test the practical activities (hands-on) before incorporating them into the lessons? |  |
| Q2  What difficulties, if any, do you encounter in implementing practical activities (hands-on) to support the teaching of abstract chemistry concepts? |  |
| ***Mexico***  Spanish | Q1  Are you interested in receiving training in the development of experimental activities with the application of the principles of green and/or sustainable chemistry?   - Yes - No | Q1  ¿Está usted interesado en recibir capacitaciones en el desarrollo de actividades experimentales con aplicación de los principios de la química verde y/o sustentable?   - Sí - No |
| Q2  Do you believe that your institution is interested in training you in the development of experimental activities with the application of the principles of green and/or sustainable chemistry?   - Yes - No | Q2  ¿Considera que su institución está interesada en capacitarlo en el desarrollo de actividades experimentales con aplicación de los principios de la química verde y/o sustentable?   - Sí - No |
| Q3  Taking into account the latest modifications in the free textbooks, do you belief that these documents provide you with tools and/or space for the development of experimental activities based on the principles of green chemistry and sustainability? Please explain. Answer NA if it does not apply to your courses. | Q3  Tomando en cuenta las últimas modificaciones en los libros de texto gratuitos, ¿considera que dichos documentos le proporcionan herramientas y/o espacio para el desarrollo de actividades experimentales con fundamento en los principios de la química verde y sustentabilidad? Responda NA en caso de que no aplique en sus cursos. |
| ***Mozambique***  Portuguese | Q1 (from Portugal)  Indicate the importance of each of the following actions.  (Nothing important; Slightly important; Moderately important; Very important; Extremely important)   - Conduct training on Sustainability. - Conduct training on Sustainable Chemistry and Green Chemistry. - Introduction of the themes "Sustainable Chemistry" and "Green Chemistry" in the curricula of Physics and Chemistry teacher training - Introduction of the themes "Sustainable Chemistry" and "Green Chemistry" in the curricula of basic education. - Development of the themes "Sustainable Chemistry" and "Green Chemistry" in secondary school curricula. | Q1  Indique a importância de cada uma das seguintes ações.  (Nada importante; Ligeiramente importante; Moderadamente importante; Muito importante; Extremamente importante)   - Realizar formação sobre Sustentabilidade. - Realizar formação sobre Química Sustentável e Química verde. - Introdução dos temas “Química Sustentável” e “Química Verde” nos currículos de formação de professores de Física e Química. - Introdução dos temas “Química Sustentável” e “Química Verde” nos currículos do ensino básico. - Desenvolvimento dos temas “Química Sustentável” e “Química Verde” nos currículos do ensino secundário. |
| Q2 (from Portugal)  Do you consider relevant the implementation of tasks, for example in DAC (Domains of curricular autonomy) projects, on Sustainability, Sustainable Chemistry and Green Chemistry, to develop the scientific literacy of students? | Q2  Considera relevante a implementação de tarefas, por exemplo nos projetos das DAC (Domínios de autonomia curricular), sobre a Sustentabilidade, Química Sustentável e Química Verde, para desenvolver a literacia científica dos alunos? |
| ***Nepal***  Nepali, English | Q1  Did you attend the Small Scale Chemistry workshop organized by IUPAC, Chemical society Thailand, Bangkok Bank, Nepal Polymer Institute organized at NAST in October 2022 in Nepal? Was it beneficial to you? Do you think it is necessary to organize more such workshops in Nepal? | Q1  के तपाइँ नेपालमा सन् २०२२ अक्टोबरमा NAST मा आयोजना भएको IUPAC, Chemical society Thailand, Bangkok Bank, Nepal Polymer Institute द्वारा आयोजित Small Scale Chemistry कार्यशाला भाग लिनु भयो? के यो तपाईलाई फाइदाजनक थियो? अझै यस्ता कार्यशाला नेपालमा आयोजना गर्नु जरुरी छ ? |
| ***New Zealand***  English | Q1 (from Slovakia)  Do you incorporate discussions about sustainability and or green chemistry into your chemistry or science lessons (across the curriculum)? If so, at what level of study and when and how so you do this. (Please provide some examples). |  |
| Q2  What prevents you from integrating sustainability and green chemistry concepts in your classrooms? |  |
| ***Nigeria***  English | Q1 (from Australia)  Have you ever heard of or been exposed to the field of green chemistry and sustainable chemistry? If so, where were you exposed? |  |
| Q2 (from Kosovo)  Do you think that chemistry teachers in Nigeria have sufficient knowledge and skills for practical activities and the implementation of green and sustainable chemistry? If not, what are the possible reasons for this? |  |
| Q3 (from USA, modified)  What are the 2 common learning outcomes you want your students to achieve or learn about green chemistry and sustainability? Are practical chemistry activities related to green chemistry and sustainability sufficiently included in the new Kosovo curriculum? Please explain your answer. |  |
| Q4  In which of the following schools do you work?   - State Secondary School - Federal Government College - State Technical College - Federal Government College - Private Secondary School |  |
| ***North Macedonia***  Macedonian,  Albanian | Q1 (from Serbia, modified)  In which type of classes do you or/and your students perform chemistry practical activities related to green chemistry and/or sustainability?   - Regular classes - Additional classes - After school activities - School chemistry club - Out of school activities - Not at all - Other (please specify) | Q1  Во кој тип на часови вие или/и вашите ученици изведувате практични активности по хемија поврзани со зелена хемија и/или одржливост?   - Редовна настава - Дополнителни часови - Вон-наставни активности - Училишен хемиски клуб/секција - Активности надвор од училиштето - Воопшто не изведувам - Друго (наведете) |
| Q2  How many seminars/trainings have you attended related to green chemistry and/or sustainability …   - in the country face-to-face… - in the country online… - outside the country face-to-face… - outside the country online… | Q2  Колку семинари/обуки имате посетено поврзани со зелената хемија и/или одржливост…   - во земјата со физичко присуство... - во земјата онлајн... - надвор од земјата со физичко присуство... - надвор од земјата онлајн... |
| Q3 (from Portugal)  Indicate the importance of each of the following actions.  (Nothing important; Slightly important; Moderately important; Very important; Extremely important)   - Conduct training on Sustainability. - Conduct training on Sustainable Chemistry and Green Chemistry. - Introduction of the themes "Sustainable Chemistry" and "Green Chemistry" in the curricula of Chemistry teacher training - Development of the themes "Sustainable Chemistry" and "Green Chemistry" in secondary school curricula (1-4th year). - Introduction of the themes "Sustainable Chemistry" and "Green Chemistry" in the curricula of primary education (1-9th grade). | Q3  Наведете ја важноста на секоја од следните дејства.  (Ништо важно; Малку важно; Умерено важно; Многу важно; Исклучително важно)   - Спроведување на обука на тема Одржливост. - Спроведување на обука за Одржлива хемија и Зелена хемија. - Воведување на темите „Одржлива хемија“ и „Зелена хемија“ во наставните програми на студиските програми за едукација на наставници по хемија - Развој на темите „Одржлива хемија“ и „Зелена хемија“ во наставните програми во средните училишта - Воведување на темите „Одржлива хемија“ и „Зелена хемија“ во наставните програми за основно образование |
| ***Norway***  Norwegian | Q1  Are chemistry practical activities related to sustainability sufficiently included in the new curriculum (LK20)? (please write your answer in detail).  What are some examples of chemistry practical activities related to sustainability that could be included in the curriculum? | Q1  Tror du at kjemipraktiske aktiviteter knyttet til bærekraft er tilstrekkelig inkludert i den nye læreplanen (LK20)? (Vennligst skriv svaret ditt i detalj)  Kan du gi noen eksempler på kjemipraktiske aktiviteter knyttet til bærekraft som kunne inkluderes i læreplanen? |
| Q2 (from USA)  When your students are engaged in green chemistry or sustainable chemistry-related laboratory activities in your classes, what are the most common 3 or 4 learning objectives that you look for your students to learn? | Q2  Når dine elever er engasjert i grønn kjemi eller bærekraftig kjemi øvelser i kjemi i dine klasser, hva er de vanligste 3 eller 4 læringsmålene du ser etter at elevene skal lære? |
| Q3  What steps could be taken to improve science and chemistry teachers' knowledge and skills about sustainability and practical activities? | Q3  Hvilke skritt kan tas for å forbedre naturfags- og kjemilærernes kunnskap og ferdigheter innen bærekraft og praktiske aktiviteter? |
| Q4  What is your opinion on whether Norwegian science and chemistry teachers have sufficient knowledge and skills regarding chemistry practical activities and sustainability? If you do not think so, what could be the reasons for this? | Q4  Hva er din mening om hvorvidt norske naturfags- og kjemilærere besitter tilstrekkelig kunnskap og ferdigheter når det gjelder kjemipraktiske aktiviteter og bærekraft? Hvis tror du ikke sånn, hva kan være årsakene til dette? |
| ***Poland***  Polish | Q1  Please indicate to what extent you agree with the following statements:  (I strongly disagree; I disagree; I neither disagree nor agree; I agree; I strongly agree)   - I am well prepared to discuss topics related to green chemistry and/or sustainability in my chemistry classes - Issues related to aspects of green chemistry and/or sustainable development should be discussed during chemistry classes - Issues related to the topic of sustainable development should be (also) discussed during lessons of other science subjects - More time should be allocated in the chemistry curriculum and syllabuses to discuss topics related to green chemistry and/or sustainable development - Knowledge of green chemistry and/or sustainable development issues is an important outcome of children and youth education in the 21st century - Society has sufficient knowledge of green chemistry and/or sustainable development issues - I would like to participate in a professional development course on teaching green chemistry and sustainable development issues in chemistry classes | Q1  Podaj w jakim stopniu zgadzasz się z poniższymi stwierdzeniami:  (zdecydowanie nie zgadzam się; nie zgadzam się; nie mam zdania; zgadzam się; zdecydowanie zgadzam się)   - Jestem dobrze przygotowany do omawiania tematów związanych z zieloną chemia i zrównoważonym rozwojem podczas lekcji chemii - Podczas lekcji chemii powinny być omawiane zagadnienie zawiązane z aspektami zielonej chemii i chemii zrównoważonego rozwoju - Zagadnienia związane z tematem zrównoważonego rozwoju powinny być (również) omawiane podczas lekcji innych przedmiotów przyrodniczych - W podstawie programowej i programach nauczania chemii należy przewidzieć więcej czasu na omawianie tematów związanych z zieloną chemia i zrównoważonym rozwojem - Znajomość tematyki zielonej chemii i zrównoważonego rozwoju jest ważnym efektem kształcenia dzieci i młodzieży w XXI wieku - W społeczeństwie jest wystarczająca znajomość tematyki elementów zielonej chemii i zrównoważonego rozwoju - Chętnie zapisałbym się na kurs dokształcający poświęcony tematyce nauczania elementów zielonej chemii i zrównoważonego rozwoju podczas lekcji chemii |
| ***Portugal***  Portuguese | Q1  Indicate the importance of each of the following actions.  (Nothing important; Slightly important; Moderately important; Very important; Extremely important)   - Conduct training on Sustainability. - Conduct training on Sustainable Chemistry and Green Chemistry. - Introduction of the themes "Sustainable Chemistry" and "Green Chemistry" in the curricula of Physics and Chemistry teacher training - Introduction of the themes "Sustainable Chemistry" and "Green Chemistry" in the curricula of basic education. - Development of the themes "Sustainable Chemistry" and "Green Chemistry" in secondary school curricula. | Q1  Indique a importância de cada uma das seguintes ações.  (Nada importante; Ligeiramente importante; Moderadamente importante; Muito importante; Extremamente importante)   - Realizar formação sobre Sustentabilidade. - Realizar formação sobre Química Sustentável e Química verde. - Introdução dos temas “Química Sustentável” e “Química Verde” nos currículos de formação de professores de Física e Química. - Introdução dos temas “Química Sustentável” e “Química Verde” nos currículos do ensino básico. - Desenvolvimento dos temas “Química Sustentável” e “Química Verde” nos currículos do ensino secundário. |
| Q2  Do you consider relevant the implementation of tasks, for example in DAC (Domains of curricular autonomy) projects, on Sustainability, Sustainable Chemistry and Green Chemistry, to develop the scientific literacy of students? | Q2  Considera relevante a implementação de tarefas, por exemplo nos projetos das DAC (Domínios de autonomia curricular), sobre a Sustentabilidade, Química Sustentável e Química Verde, para desenvolver a literacia científica dos alunos? |
| ***Romania***  Romanian, Hungarian | Q1 (from Hungary, modified)  Please, describe with a metaphor the following concepts and explain briefly why you have chosen it. (open response)  The education for sustainability is like ... , …because...  The practical activities in the class are like ... , …because... | Q1  Vă rugăm să descrieți cu o metaforă următoarele concepte și să explicați pe scurt. (răspuns deschis)  Educația pentru sustenabilitate este ca...,  …pentru că...  Activitățile practice din clasă sunt ca ... ,  …pentru că... |
| Q2 (from Hungary)  Please name up to three practical activities that you used in collaboration with other teachers or subjects for education for sustainability. | Q2  Vă rugăm să enumărați cel puțin trei activități practice pe care le-ați folosit în colaborare cu alți profesori sau discipline cu scopul educației pentru sustenabilitate. (răspuns scurt, răspuns deschis) |
| Q3 (from Hungary)  Please name up to three extracurricular practical activities that you used in the field of education for sustainability. | Q3  Vă rugăm să să enumărați cel puțin trei activități practice extracurriculare pe care le-ați folosit în domeniul educației pentru sustenabilitate. (răspuns scurt, răspuns deschis) |
| ***Serbia***  Serbian | Q1  Within which subject do you perform chemistry practical activities related to green chemistry and/or sustainability?   - Chemistry as a general subject - Vocational subjects from chemistry branches - Elective subjects that include chemistry contents - Other (please specify) | Q1  U okviru kog predmeta izvodite praktične aktivnosti koje se odnose na zelenu hemiju i/ili održivi razvoj?   - Hemija kao opšteobrazovni predmet - Stručni predmet iz oblasti hemije - Izborni predmet koji obuhvata hemijske sadržaje - Drugo (navedite tačno). |
| Q2  In which type of classes do you or/and your students perform chemistry practical activities related to green chemistry and/or sustainability?   - Regular classes - Additional classes - After school activities - School chemistry club - Out of school activities - Other (please specify) | Q2  U okviru kakve nastave vi ili vaši učenici izvodite hemijske praktične aktivnosti vezane za zelenu hemiji i/ili održivi razvoj?   - Regularna nastava - Dodatna nastava - Vannastavne aktivnosti - Školski hemijski klub - Izvanškolske aktivnosti - Drugo (navedite tačno). |
| ***Slovakia***  Slovakian | Q1 (from Australia)  Did your pre-service courses include any instruction on teaching green chemistry or sustainability topics? If yes, please provide examples. | Q1  Zahŕňala Vaša príprava na učiteľstvo chémie aj informácie týkajúce sa výučby tém z oblasti zelenej chémie a/alebo udržateľného rozvoja? |
| Q2  Do you incorporate discussions on green chemistry and sustainability into classes beyond chemistry at your school? If so, how and when do you do so? Give some examples. | Q2  Začleňujete témy a diskusie o zelenej chémii a udržateľnom rozvoji do iných vyučovacích hodín okrem chémie? Ak áno, ako a kedy to robíte? Uveďte príklady takých tém. |
| ***Slovenia***  Slovenian | Q1 (from Australia)  Have you studied or been exposed to the field of sustainability chemistry and green chemistry? If so, where were you exposed? | Q1  Ali ste se že seznanili oz. ste spoznavali področje zelene in trajnostne kemije? Če da, kje? |
| Q2 (from Slovakia, modified)  Did your pre-service/initial teacher education include any instruction on teaching green chemistry or sustainability topics? If yes, please provide examples. If you don't remember, leave this response blank. | Q2  Ali so študij na univerzi oz. stalno strokovno spopolnjevanje ali seminarji študijskih skupin in druga strokovna srečanja, zajemali tudi smernice/navodila, kako poučevati vsebine zelene in trajnostne kemije? Če da, natančneje pojasnite, kje ste te vsebine spoznali in kaj so obsegale. |
| Q3 (from USA)  When your students are engaged in green chemistry or sustainable chemistry-related practical activities in your classes, what are the most common 3 or 4 learning objectives that you look for your students to learn? | Q3  Navedite, prosim, tri ali štiri najobičajnejše učne cilje, ki jih želite doseči pri učencih, ko pri pouku izvajate praktične aktivnosti (npr. eksperimentalno delo), s področja zelene in trajnostne kemije. Če teh aktivnosti ne izvajate, to vprašanje preskočite. |
| Q4 (from Indonesia, modified)  Consider the most recent implementation of a new chemistry curriculum in your state. Did it encourage you to incorporate new practical activities that apply the green chemistry and sustainability principles? If yes, please explain why. If not, please explain why it didn't. | Q4  Ali vas trenutni učni načrt za kemijo spodbuja, da bi v pouk vključevali praktične aktivnosti (npr. eksperimentalno delo) s področja zelene in trajnostne kemije? Če ne, zakaj ne, če da, katere so te aktivnosti in zakaj jih vključujete v pouk. |
| ***South Africa***  English | Q1 (from Australia)  Have you studied or been exposed to the field of sustainability chemistry and green chemistry? If so, where were you exposed? |  |
| Q2 (from Slovakia, modified)  Did your pre-service/initial teacher education include any instruction on teaching green chemistry or sustainability topics? If yes, please provide examples. If you don't remember, leave this response blank. |  |
| Q3 (from USA)  When your students are engaged in green chemistry or sustainable chemistry-related practical activities in your classes, what are the most common 3 or 4 learning objectives that you look for your students to learn? |  |
| ***South Korea***  Korean | Q1  To what extent and in what ways do you believe the national curriculum highlights the importance of green and sustainable chemistry? | Q1  선생님께서는 국가 교육과정에서 녹색 화학과 지속 가능한 화학의 중요성을 얼마나, 그리고 어떻게 강조하고 있다고 생각하십니까? |
| Q2a  To what extent do you see a need to provide additional educational materials related to green or sustainable chemistry for chemistry classes?   - Not at all necessary - Slightly necessary - Neutral / No opinion - Somewhat necessary - Very necessary | Q2a  선생님께서는 녹색화학 또는 지속가능한 화학과 관련된 추가 교육 자료 제공의 필요성을 어느 정도 느끼십니까?   - 전혀 필요하지 않음 - 필요하지 않음 - 보통 - 조금 필요함 - 매우 필요함 |
| Q2b  If educational materials related to green chemistry or sustainable chemistry are provided, would you be willing to use them?   - Not at all - Not likely - Moderately likely - Likely - Very likely | Q2a  만약 녹색화학이나 지속가능한 화학 관련 교수학습자료가 제공된다면, 선생님께서 활용할 의향이 있으십니까   - 전혀 아님 - 아님 - 보통 - 있음 - 매우 있음 |
| Q3a  Do you think students should learn about green chemistry or sustainable chemistry during chemistry classes?   - Strongly disagree - Disagree - Neutral - Agree - Strongly agree | Q3a  선생님께서는 학생들이 녹색화학 또는 지속가능한 화학에 대해 배워야 한다고 생각하십니까?   - 전혀 동의하지 않음 - 동의하지 않음 - 보통 - 동의함 - 매우 동의함 |
| Q3b  What is the reason for your opinion? | Q3b  그 이유는 무엇입니까? |
| ***Spain***  Spanish | Q1  In your opinion, does the Masters Degree in Secondary Education Teacher Training prepares you for designing and using practical activities in chemistry teaching?   - Yes - No - I did not complete this Masters Degree | Q1  ¿Considera que ha recibido formación suficiente en el Máster en Formación del Profesorado para diseñar y realizar con su alumnado actividades prácticas para la enseñanza de la química?   - Sí - No - No cursé el Máster en Formación del Profesorado |
| Q2  How often your Secondary Education students work in the school laboratory every session?   - Everyday - Once a week - Every 15 days - Once a month - Never - Currently I do not teach Secondary Education courses - Other answer: | Q2  ¿Con qué frecuencia su alumnado de ESO trabaja en el laboratorio cada trimestre?   - Cada día - Cada semana - Cada 15 días - Una vez al mes - Nunca - Actualmente no imparto docencia en ESO - Otra respuesta: |
| Q3  How often your Higher Secondary Education students work in the school laboratory every session?   - Everyday - Once a week - Every 15 days - Once a month - Never - Currently I do not teacher Higher Secondary Education courses - Other answer: | Q3  ¿Con qué frecuencia su alumnado de Bachillerato trabaja en el laboratorio cada trimestre?   - Cada día - Cada semana - Cada 15 días - Una vez al mes - Nunca - Actualmente no imparto docencia en Bachillerato - Otra respuesta: |
| ***Sweden***  Swedish | Q1 (from USA)  To what extent do you /or your science department in your school adhere to the following laboratory management practices?  (nearly always, most of the time, sometimes, rarely, almost never)   - minimization of waste (e.g., microscale) - use of virtual labs - use of non-toxic reagents and/or solvents - use of energy efficient processes (e.g., microwave oven for heating) - incorporation of questions in the lab writeup for students that ask about relevance of green chemistry | Q1  I vilken utsträckning följer du och kollegorna i kemi/NO på din skola följande riktlinjer för laborativt arbete?  (nästan alltid, oftast, ibland, sällan, nästan aldrig)   - Minimering av avfall (exempelvis mikroskala) - Användning av virtuella laborationer - Användning av ofarliga kemikalier - Användning av energisnåla metoder (exempelvis mikrovågsugn för uppvärmning) - e) Frågor relaterade till grön eller hållbar kemi vid diskussion av resultat från laborationer |
| ***Switzerland***  French, German, Italian | Q1 (from Slovakia)  Did your pre-service courses include any instruction on teaching green chemistry or sustainability topics? If yes, please provide examples. | Q1  Est-ce que l'enseignement de la chimie verte et/ou de la chimie durable faisait partie de votre formation d'enseignant-e ? Si oui, veuillez donner des exemples. |
| Q2a (from Norway, modified)  Do you think Swiss chemistry/natural sciences teachers have enough knowledge and skills about green chemistry and/or sustainable chemistry? If not, what are the possible reasons for these? | Q2  Pensez-vous que les enseignant-e-s de chimie/sciences naturelles suisses disposent de connaissances et de compétences suffisantes en matière de chimie verte et/ou de chimie durable ? Si ce n'est pas le cas, quelles en sont les raisons possibles ? |
| Q2b. (From Norway, modified)  What measures could be taken to improve the knowledge and skills of chemistry/natural sciences teachers in green chemistry and/or sustainable chemistry? | Q3  Quelles mesures pourraient être prises pour améliorer les connaissances et les compétences des enseignant-e-s de chimie/sciences naturelles en matière de chimie verte et/ou de chimie durable ? |
| Q3 (from USA)  Indicate the importance of each of the following actions.  (Nothing important; Slightly important; Moderately important; Very important; Extremely important)   - Conduct training on Sustainability. - Conduct training on Sustainable Chemistry and Green Chemistry. - Introduction of the themes "Sustainable Chemistry" and "Green Chemistry" in the curricula of Physics and Chemistry teacher training - Development of the themes "Sustainable Chemistry" and "Green Chemistry" in secondary school curricula. | Q3  Evaluez l'importance des mesures suivantes pour l'intégration de la chimie verte et/ou de la chimie durable dans les cours de chimie.  (Pas du tout important ; Peu important ; Modérément important ; Très important ; Extrêmement important)   - Formations continues sur la durabilité - Formations continues sur la chimie verte et/ou la chimie durable. - Intégration de la durabilité, de la chimie verte et/ou de la chimie durable dans les cours de formation des enseignant-e-s. - Introduction de la chimie verte et/ou de la chimie durable dans les programmes de l'enseignement secondaire inférieur et supérieur. |
| Q4 (from USA, modified)  When your students are engaged in green chemistry or sustainable chemistry-related laboratory activities in your classes, what are the most common 3 or 4 learning objectives that you look for your students to learn? | Q4  Quels sont les 3 ou 4 objectifs d'apprentissage les plus courants que vous souhaitez transmettre à vos élèves lorsqu'il-elle-s étudient la chimie verte et/ou la chimie durable dans le cadre de vos cours ? |
| ***Thailand***  Thai | Q1  Have you ever attend a Dow Chemistry Classroom project/training in small scale chemistry ?   - Yes (Please specify - batch of ..../ Year…….) - No | Q1  คำถามเพิ่มเติมสำหรับประเทศไทย ท่านเคยได้รับการอบรมในโครงการห้องเรียนเคมีดาว /ฝึกฝนเพิ่มเติมด้านปฏิบัติการเคมีแบบย่อส่วน   - เคย - โปรดระบุ รุ่น……../ปี พ.ศ………….. - ไม่เคย |
| Q2  What small scale chemistry experiment have you used in teaching? (Select all that apply) /How often do you use of the following experiment in your chemistry class?   - Copper Isolation by electrochemistry……….. Times/year - Electrolysis of water……….. Times/year - Hydrogen explosion……….. Times/year - Interdiffusion of gases……….. Times/year - Property of carbon dioxide…….. Times/year - Property of oxygen……….. Times/year - Solubility of ammonia……….. Times/year - Titration of strong acid and base - pH indicators……….. Times/year - Reaction of acid and carbonate....Times/year - Acid rain……….. Times/year - Paper chromatography……….. Times/year - Convection current……….. Times/year | Q2  หลังจากอบรมแล้ว ท่านได้นำปฏิบัติการเคมีแบบย่อส่วนเรื่องใดบ้างไปใช้ในการสอนหรืองานอื่นๆ (ตอบได้มากกว่า 1 ข้อ) /จำนวนครั้งที่ใช้ต่อปี   - การแยกทองแดงด้วยเคมีไฟฟ้า…………ครั้ง/ปี - การแยกน้ำด้วยไฟฟ้า…………ครั้ง/ปี - การระเบิดของไฮโดรเจน…………ครั้ง/ปี - การแพร่ของแก๊ส…………ครั้ง/ปี - สมบัติของแก๊สคาร์บอนไดออกไซด์…………ครั้ง/ปี - สมบัติของแก๊สออกซิเจน…………ครั้ง/ปี - การละลายของแอมโมเนีย…………ครั้ง/ปี - การไทเทรตกรดแก่-เบสแก่…………ครั้ง/ปี - พีเอชอินดิเคเตอร์…………ครั้ง/ปี - ปฏิกิริยาของกรดกับคาร์บอเนต…………ครั้ง/ปี - ฝนกรด…………ครั้ง/ปี - โครมาโทรกราฟีแบบกระดาษ…………ครั้ง/ปี - การพาความร้อนของของเหลว…………ครั้ง/ปี |
| Q3  Which experiment is most commonly used in teaching?  Why? (You can list down more than one reason)  1.………………………………………  2…………………………………………  3………………………………………… | Q3  การทดลองเรื่องใดที่นิยมนำไปใช้สอนมากที่สุด  เหตุผลคือ.... (ตอบได้มากกว่าหนึ่งเหตุผล)  1.………………………………………  2…………………………………………  3………………………………………… |
| ***Türkiye***  Turkish | Q1 (from Czechia, modified)  Do you think you could use virtual labs, animations, simulations instead of chemistry practical? Why/Why not? Please explain your answer. | Q1  Kimya laboratuvar uygulamaları yerine sanal laboratuvarlar, animasyonlar veya simülasyonları kullanabileceğinizi düşünüyor musunuz? Neden? Lütfen cevabınızı açıklayın. |
| Q2 (from Czechia, modified)  Especially in which topics and grade level would you use virtual labs, animations, simulations? Why? Please explain your answer. | Q2  Özellikle hangi konularda ve sınıf düzeyinde sanal laboratuvarlardan, animasyonlardan veya simülasyonlardan yararlanırsınız? Neden? Lütfen cevabınızı açıklayınız. |
| ***United Kingdom***  English | Q1 (from Czechia, modified)  Do you think you could use virtual labs, animations, simulations instead of chemistry practical? Why/Why not? Please explain your answer. |  |
| Q2 (from USA)  To what extent do you and/or your science department in your school adhere to the following laboratory management practices?  (nearly always; most of the time; sometimes, rarely; almost never)   - minimization of waste (e.g., microscale) - use of virtual labs - use of non-toxic reagents and/or solvents - use of energy efficient processes (e.g., microwave oven for heating) - incorporation of questions in the lab writeup for students that ask about relevance of green chemistry |  |
| Q3  Do you use ChatGPT or other Generative Artificial Intelligence to support your chemistry or science laboratory teaching? Why or Why not? Please explain your answer. |  |
| ***United States of America***  English | Q1  When your students are engaged in green chemistry or sustainable chemistry-related laboratory activities in your classes, what are the most common 3 or 4 learning objectives that you look for your students to learn? |  |
| Q2  Choose one of the learning objectives that you specified. Please provide a few indicators that you look for at each of three levels to determine the quality of student learning:   1. advanced level of skill/understanding… 2. proficient level of skill/understanding… 3. emerging or less than proficient level of skill/understanding…. |  |
| Q3  To what extent do you and/or your science department in your school adhere to the following laboratory management practices?  (nearly always; most of the time; sometimes; rarely; almost never)   - minimization of waste (e.g., microscale) - use of virtual labs - use of non-toxic reagents and/or solvents - use of energy efficient processes (e.g., microwave oven for heating) - incorporation of questions in the lab writeup for students that ask about relevance of green chemistry |  |
